# Supplementary material for: SB203580, a p38MAPK inhibitor, attenuates olfactory dysfunction by inhibiting OSN apoptosis in AR mice (activation and involvement of the p38 mitogen‐activated protein kinase in olfactory sensory neuronal apoptosis of OVA‐induced allergic rhinitis)
Source: PubMed Central journal article supplement (PMC6577615; doi:10.1002/brb3.1295), 2019-04-30
Supplement: BRB3-9-e01295-s001.pdf [file BRB3-9-e01295-s001.pdf]

## SUPPORTING INFORMATION

Article ID: 1295

Article DOI: 10.1002/BRB3.1295

### **Article title**

SB203580, a p38MAPK inhibitor, attenuates olfactory dysfunction by inhibiting OSN apoptosis in AR mice (Activation and involvement of the p38 mitogen-activated protein kinase in olfactory sensory neuronal apoptosis of OVA-induced allergic rhinitis).

### **Running head**

SB203580 attenuates dysosmia by inhibiting OSN apoptosis

### **Names of authors, their degrees and affiliations**

Xian Gao<sup>1,2</sup>, Master of Medicine

Na Li<sup>2</sup> ✉, M.D., Ph.D.

Jisheng Zhang<sup>2</sup>, Ph.D.

1. Department of Otolaryngology-Head and Neck Surgery, The Affiliated Qingdao Municipal Hospital of Qingdao University, Qingdao, Shandong, China

2. Department of Otolaryngology-Head and Neck Surgery, The Affiliated Hospital of Qingdao University, Qingdao, Shandong, China

✉ Corresponding author.

✉ Corresponding author.

Na Li, Department of Otolaryngology-Head and Neck Surgery, the Affiliated Hospital of Qingdao University, Jiangsu Road No. 16, Qingdao, Shandong 266003, PR China.

Email: [dr.lina@163.com](mailto:dr.lina@163.com)

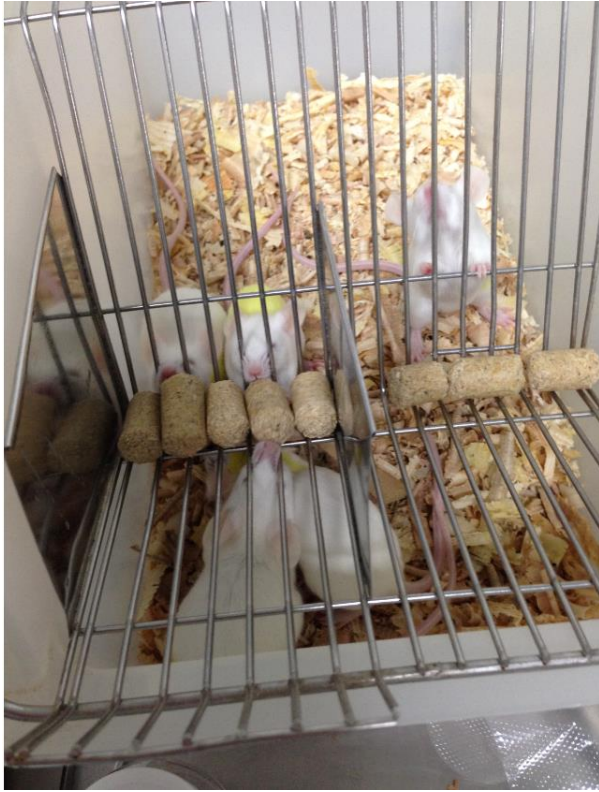

Figure S1 The BALB/c mice in the experiment.

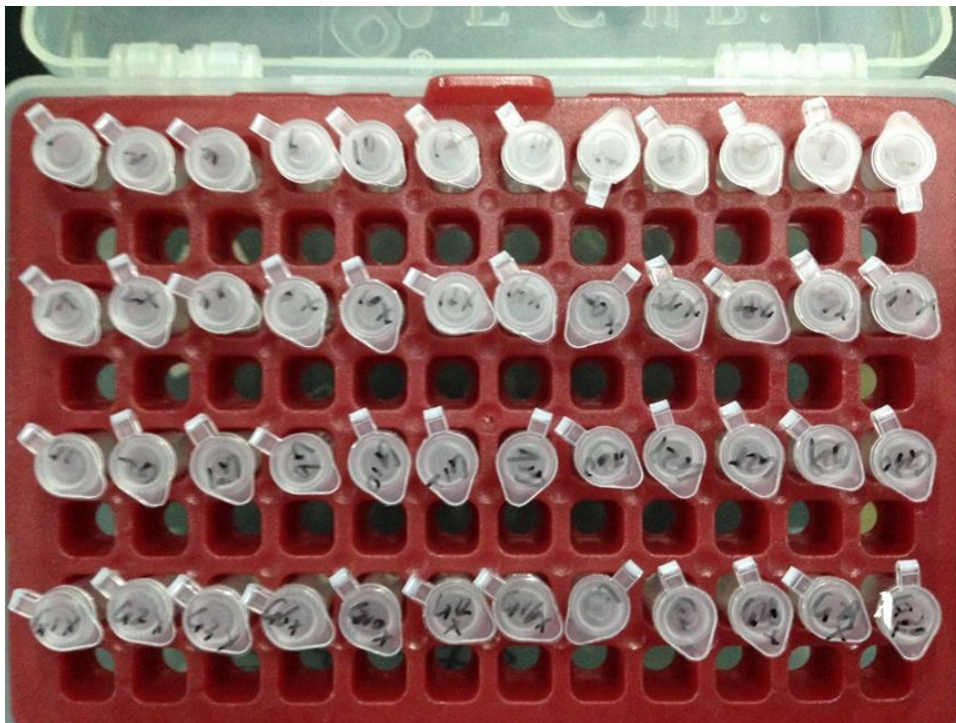

Figure S2 Part of the RNA was extracted from mouse serum



Figure S5 Some of the data of BFPT.

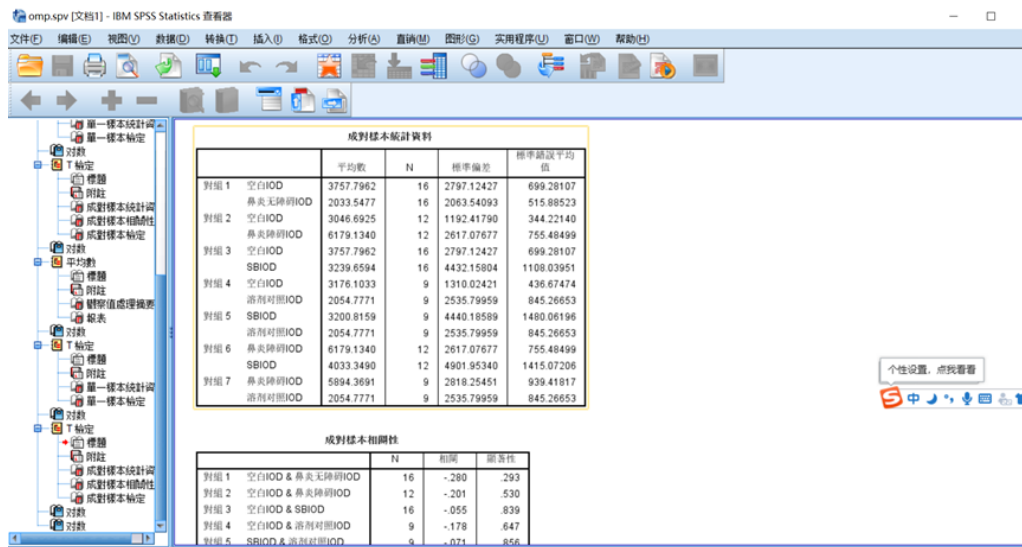

Figure S6 Some of the data of depression of OMP in SPSS.

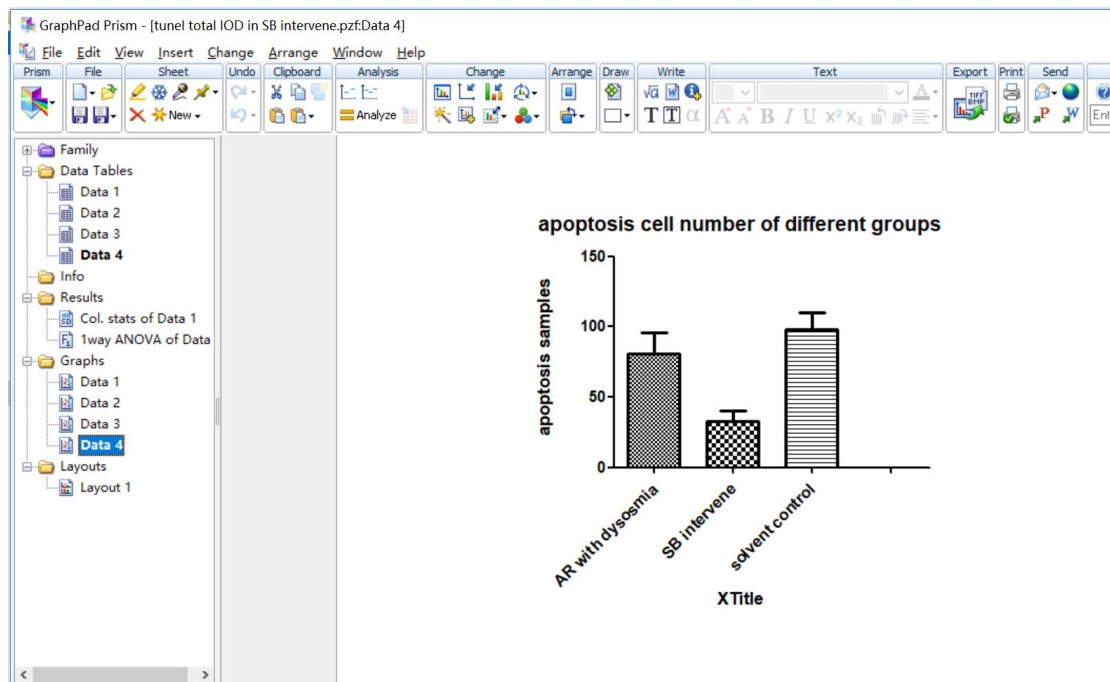

Figure S7 Some of the data of depression of apoptosis cell number in GraphPad Prism
